# Supplementary material
Source: PubMed Central journal article supplement (PMC4096613)
Supplement: NIHMS574219-supplement-Supplementary_Appendix.pdf [file NIHMS574219-supplement-Supplementary_Appendix.pdf]

Loss Frame,  
Branded



**WARNING:**  
Cigarettes  
cause strokes  
and heart  
disease.

© U.S. HHS 1-800-QUIT-NOW

**Peter  
Jackson**  
ORIGINAL

PREMIUM QUALITY 20



1-800-QUIT-NOW

© U.S. HHS

**WARNING:** Cigarettes  
cause fatal lung disease.

**Peter  
Jackson**  
ORIGINAL

PREMIUM QUALITY 20



1-800-QUIT-NOW © U.S. HHS

**WARNING:**  
Cigarettes cause cancer.

**Peter  
Jackson**  
ORIGINAL

PREMIUM QUALITY 20



© U.S. HHS 1-800-QUIT-NOW

**WARNING:**  
Smoking can kill you.

**Peter  
Jackson**  
ORIGINAL

PREMIUM QUALITY 20

Loss Frame,  
Plain



**WARNING:**  
Cigarettes  
cause strokes  
and heart  
disease.

© U.S. HHS 1-800-QUIT-NOW

Peter Jackson



1-800-QUIT-NOW

© U.S. HHS

**WARNING:** Cigarettes  
cause fatal lung disease.

Peter Jackson



1-800-QUIT-NOW © U.S. HHS

**WARNING:**  
Cigarettes cause cancer.

Peter Jackson



© U.S. HHS 1-800-QUIT-NOW

**WARNING:**  
Smoking can kill you.

Peter Jackson

**Gain Frame,  
Branded**

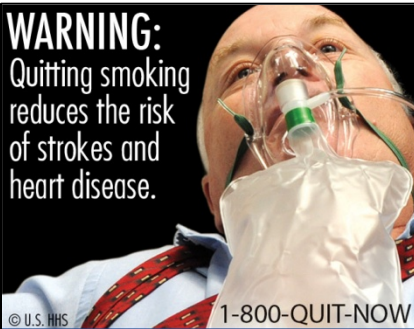

**WARNING:** Quitting smoking reduces the risk of strokes and heart disease.

© U.S. HHS 1-800-QUIT-NOW

**Peter Jackson**  
ORIGINAL

PREMIUM QUALITY 20



1-800-QUIT-NOW

© U.S. HHS

**WARNING:** Quitting smoking reduces the risk of fatal lung disease.

**Peter Jackson**  
ORIGINAL

PREMIUM QUALITY 20



1-800-QUIT-NOW

© U.S. HHS

**WARNING:** Quitting smoking reduces the risk of cancer.

**Peter Jackson**  
ORIGINAL

PREMIUM QUALITY 20



1-800-QUIT-NOW

© U.S. HHS

**WARNING:** Quitting smoking reduces the risk of death due to tobacco.

**Peter Jackson**  
ORIGINAL

PREMIUM QUALITY 20

**Gain Frame,  
Plain**

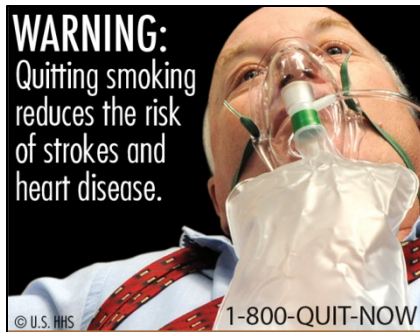

Peter Jackson

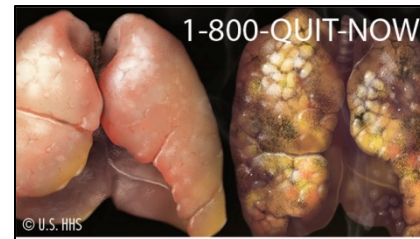

**WARNING:** Quitting smoking reduces the risk of fatal lung disease.

Peter Jackson

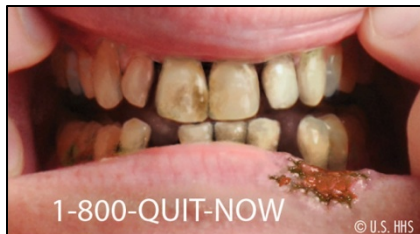

**WARNING:** Quitting smoking reduces the risk of cancer.

Peter Jackson

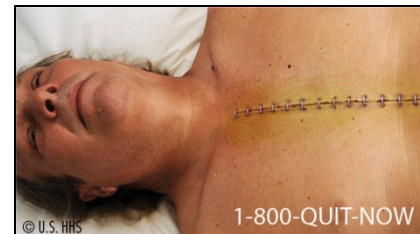

**WARNING:** Quitting smoking reduces the risk of death due to tobacco.

Peter Jackson
